# Modeling the consequences of regional heterogeneity in human papillomavirus (HPV) vaccination uptake on transmission in Switzerland

Maurane Riesen<sup>a,b,\*</sup>, Victor Garcia<sup>a</sup>, Nicola Low<sup>a</sup>, Christian L. Althaus<sup>a</sup>

<sup>a</sup>*Institute of Social and Preventive Medicine, University of Bern, Bern, Switzerland*

<sup>b</sup>*Graduate School for Cellular and Biomedical Sciences, University of Bern, Bern, Switzerland*

## Abstract

**Background:** Completed human papillomavirus (HPV) vaccination by age 16 years among women in Switzerland ranges from 17 to 75% across 26 cantons (states). The consequences of regional heterogeneity in vaccination coverage on transmission and prevalence of HPV-16 are unclear.

**Methods:** We developed a deterministic, population-based model that describes HPV-16 transmission among young adults within and between the 26 cantons of Switzerland. We parameterized the model using sexual behavior data from Switzerland and data from the Swiss National Vaccination Coverage Survey. First, we investigated the general consequences of heterogeneity in vaccination uptake between two sub-populations. We then compared the predicted prevalence of HPV-16 after the introduction of heterogeneous HPV vaccination uptake in all of Switzerland with homogeneous vaccination at an uptake that is identical to the national average (52%).

**Results:** HPV-16 prevalence in women is 3.34% when vaccination is introduced and begins to diverge across cantons, ranging from 0.14 to 1.09% after 15 years of vaccination. After the same time period, overall prevalence of HPV-16 in Switzerland is only marginally higher (0.55 %) with heterogeneous vaccination uptake than with homogeneous uptake (0.49%). Assuming inter-cantonal sexual mixing, cantons with low vaccination uptake benefit from a reduction in prevalence at the expense of cantons with high vaccination uptake.

**Conclusions:** Regional variations in uptake diminish the overall effect of vaccination on HPV-16 prevalence in Switzerland, although the effect size is small. Cantonal efforts towards HPV-prevalence reduction by increasing vaccination uptake are impaired by cantons with low vaccination uptake. Harmonization of cantonal vaccination programs would reduce heterogeneity in uptake and increase impact.

**Keywords:** human papillomavirus, vaccination, sexual behavior, mathematical model, Switzerland

## 1. Introduction

The first vaccine against human papillomavirus (HPV) was licensed in 2006 and is now widely used in many countries. At the population-level, HPV vaccination has led to a substantial reduction in the prevalence of the targeted HPV types (HPV-16/18/6/11 for the quadrivalent vaccine) as well as anogenital warts [1]. Most vaccination programs target girls or young women before they become sexually active. Regional differences in vaccination uptake have emerged in some countries after implementation of the vaccination programs [2, 3]. These differences are very pronounced in Switzerland where the proportion of complete three dose vaccination schedule in 16 year old girls ranges from 17 to 75% in 26 cantons (states) (Fig. 1) [4, 5]. The cantonal heterogeneity in vaccination uptake can be partly explained by differences in the way the vaccine is offered

to women (e.g., school-based programs, general practitioners or gynecologist). Other factors, such as cultural differences between the cantons might play a role too. To date, the potential epidemiological consequences of regional variation in vaccination uptake on transmission and prevalence of HPV in Switzerland and other countries are not well understood.

Mathematical models have played an important role in estimating the expected impact of vaccination on the transmission of HPV [6–8] and other infections [9]. Investigating the consequences of spatial heterogeneity in vaccination uptake has received less attention, with some mentionable exceptions. Studies on measles vaccination [10, 11] and canine rabies [12] showed that spatial vaccination heterogeneity leads to less effective control of the targeted disease when compared with homogeneous vaccination. The debate about heterogeneity in HPV vaccination uptake has focused on sex-specific vaccination [13, 14]. Sex-specific vaccination is expected to be more beneficial than to homogeneous (male/female) vaccination in a heterosexual population because both sexes are required for the transmission. Therefore if only one sex is targeted by the vaccine, although around 50% of the total population would be

\*Corresponding author.

Email addresses: [maurane.riesen@ispm.unibe.ch](mailto:maurane.riesen@ispm.unibe.ch) (Maurane Riesen), [vic-garcia@gmx.net](mailto:vic-garcia@gmx.net) (Victor Garcia), [nicola.low@ispm.unibe.ch](mailto:nicola.low@ispm.unibe.ch) (Nicola Low), [christian.althaus@alumni.ethz.ch](mailto:christian.althaus@alumni.ethz.ch) (Christian L. Althaus)

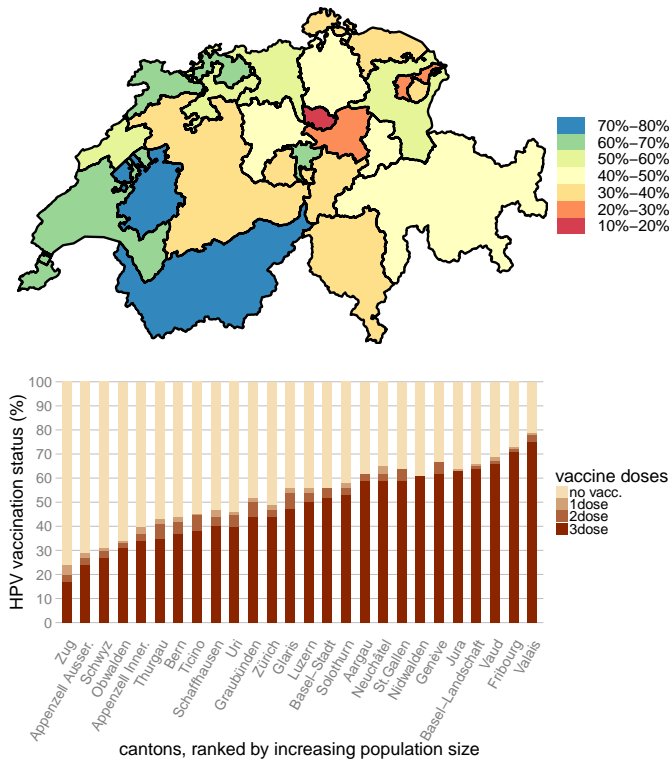

**Fig. 1.** HPV vaccination uptake in 16 year old girls in Switzerland. Data represent the last completed survey period (2011–2013) of the Swiss National Vaccination Coverage Survey (SNVCS). Data for Geneva and Appenzell Innerrhoden are from 2010 and 2014, respectively.

vaccinated, the transmission would be blocked as the vaccine-targeted sex would act as a dead-end host. Spatial variation in HPV vaccination uptake between states in the United States of America (USA) has been taken into account in a modeling study that quantified the epidemiological impact and cost-effectiveness of adopting a new, nonavalent HPV vaccine [15]. This study illustrated that expanding vaccination coverage in states with low coverage would result in the greatest health impact because of the decreasing marginal returns of herd immunity. This finding is supported by another modeling study from Canada showing that the effect of unequal vaccination uptake among school girls by ethnicity on cervical cancer incidence may be lower than with equal vaccination [16]. The effects of spatial heterogeneity in vaccination uptake crucially depend on sexual mixing between different regions, as well as herd immunity thresholds and other disease-specific characteristics. A better understanding of how these factors affect the transmission and prevalence of HPV may help to better interpret the expected or observed impact of HPV vaccination programs.

The aim of this study was to investigate the impact of heterogeneous vaccination uptake and different sexual mixing scenarios on the prevalence of HPV-16 in Switzerland. Our main hypothesis was that heterogeneous vaccination would substantially reduce the impact of vaccination. We developed a mathematical model of HPV-16 transmission among young hetero-

sexual adults. We parameterized the model using Swiss sexual behavior data and calculated the pre-vaccination prevalence and the basic reproduction number ( $R_0$ ) of HPV-16. First, we investigated the general consequences of heterogeneous vaccination uptake in a simple model with two sub-populations. We then simulated the transmission of HPV-16 within and between the 26 cantons of Switzerland assuming three different scenarios for inter-cantonal sexual mixing. We compared the predicted post-vaccination prevalence of HPV-16 after the introduction of heterogeneous HPV vaccination uptake with a default scenario of homogeneous vaccination.

## 2. Methods

### 2.1. HPV-16 transmission model

We developed a deterministic, population-based model of HPV-16 transmission that is based on well-established work on modeling sexually transmitted infections (STIs) [17–19]. We implemented the spatial (cantonal) structure into a meta-population model, and considered the population of 18–24 year old heterosexual Swiss adults who can be susceptible ( $S$ ), infected ( $I$ ), recovered ( $R$ ) or vaccinated ( $V$ ). These compartments are further divided into sub-compartments that reflect the individuals' sex, sub-population/canton and sexual activity level, and can be described by the following system of ordinary differential equations (ODEs):

$$\frac{dS_{skr}}{dt} = (1 - p_{sk})\mu N_{skr} - \lambda_{skr}S_{skr} + \omega R_{skr} - \mu S_{skr} \quad (1)$$

$$- mS_{skr} + mn_r \sum_u S_{sku}, \quad (2)$$

$$\frac{dI_{skr}}{dt} = \lambda_{skr}S_{skr} - \gamma I_{skr} - \mu I_{skr} - mI_{skr} + mn_r \sum_u I_{sku}, \quad (3)$$

$$\frac{dR_{skr}}{dt} = \gamma I_{skr} - \omega R_{skr} - \mu R_{skr} - mR_{skr} + mn_r \sum_u R_{sku}, \quad (4)$$

$$\frac{dV_{skr}}{dt} = p_{sk}\mu N_{skr} - \mu V_{skr} - mV_{skr} + mn_r \sum_u V_{sku}. \quad (5)$$

Here, the subscripts  $s$ ,  $k$  and  $r$  denote sex, sub-population/canton and sexual activity group, respectively. Susceptible individuals ( $S$ ) can become infected at rate  $\lambda_{skr}$  (force of infection). Infected individuals ( $I$ ) spontaneously clear HPV-16 at rate  $\gamma$  to become temporarily immune. Recovered individuals ( $R$ ) lose their immunity at rate  $\omega$  and become susceptible again. All individuals enter and leave the population at rate  $\mu$  with  $N_{skr} = S_{skr} + I_{skr} + R_{skr} + V_{skr}$  being the population size of individuals that have sex  $s$ , reside in sub-population/canton  $k$  and belong to sexual activity group  $r$ .  $p_{sk}$  is the sub-population- or canton-specific proportion of individuals that are vaccinated upon entering the population. We assumed vaccine efficacy is 100% (3 doses) and lasts for an individual's sexual lifetime. Individuals can change their sexual behavior at rate  $m$ , i.e., they are redistributed to either the same or another sexual activity group proportional to the size of the target group [19, 20].

## 2.2. Data and parameters

### 2.2.1. Vaccination uptake

We used data from the Swiss National Vaccination Coverage Survey (SNVCS) to obtain the proportion of women who are vaccinated in each canton (Fig. 1, table. A.4). The SNVCS monitors immunization coverage of children and adolescents and compiles them into three-year bands. For HPV vaccination, the survey focuses on 16 years old girls. In this study, we used data from the last available survey period (2011–2013), except for the canton of Geneva (GE) and Appenzell Innerrhoden (AI) where we used data from the years 2010 and 2014, respectively. Two HPV vaccines are currently authorized in Switzerland: Gardasil® (Sanofi Pasteur MSD) which targets four HPV types (HPV-6/11/16/18), and Cervarix® (GlaxoSmithKline) which targets two HPV types (HPV-16/18). In Switzerland 95% of vaccinated women received the quadrivalent vaccine [4]. We used the proportion of fully vaccinated women (completed three doses) as a model parameter. Although Switzerland adopted the two-dose HPV vaccination schedule in 2012, we assumed that this has not been implemented in the cantonal programmes at the time the survey was led. We did not consider HPV vaccination in boys and young men, as uptake in Switzerland is negligible at present.

### 2.2.2. Sexual behavior

We used data from the SIR (Screening, Impfung und Risikofaktoren) survey [4]. The Swiss Federal Office of Public Health (FOPH) conducted this survey in 2014 and collected data on the sexual behavior of 18–24 year old Swiss women ( $n = 1,291$ ). We categorised the study participants into two sexual activity groups and estimated the sexual partner change rates by assuming that the reported numbers of new heterosexual partners in the last year can be described by two Poisson distributions, weighted by the proportion of individuals in each sexual activity group [19, 21]. The survey did not include men, so we assumed their sexual activity to be the same as for women. Furthermore, we assumed that sexual behavior does not differ between cantons. We compared the modeled prevalence of HPV-16 based on the Swiss sexual behavior data to the expected prevalence based on data from the third British National Survey of Sexual Attitudes and Lifestyles 3 (Natsal-3,  $n = 1,611$ ) [22].

### 2.2.3. Inter-cantonal mixing

We used mobility data from the Swiss Federal Office for Spatial Development (ARE) as a proxy for sexual mixing between different cantons. The data set contains the average daily commuting data by public transport and individual vehicles from Monday to Friday in 2010 [23].

### 2.2.4. Other parameters

We used publicly available data about the number of 18–24 year olds in each canton in 2013 from the website of the Swiss Federal Statistical Office (FSO) [24]. Parameters that describe the transmission and life-history of HPV-16 were informed by the literature [25, 26] and assumed to be the same for women and men. All parameter values and their sources are specified in Table 1.

## 2.3. Sexual mixing and force of infection

The force of infection,  $\lambda_{skr}$ , depends on assumptions about sexual contact preferences between individuals from different sexual activity groups and sub-populations/cantons. We devised three different scenarios of increasing complexity to account for different spatial mixing patterns (Fig. 2):

1. *Assortative sexual mixing*: Sexual contacts only occur between individuals from the same sub-population/canton.
2. *Proportional sexual mixing*: A fraction of sexual contacts occur between individuals from the same sub-population/canton, while the remaining contacts are proportionally distributed across all sub-populations/cantons.
3. *Mobility-informed sexual mixing*: Swiss mobility data are used as a proxy for inter-cantonal sexual mixing.

### 2.3.1. Assortative and proportional sexual mixing

The first two scenarios where we assumed fully assortative or partial proportional mixing between sub-populations/cantons result in the following force of infection:

$$\lambda_{skr} = \beta c_r \sum_{k'} \sum_{r'} \rho_{ss'kk'rr'} \frac{I_{s'k'r'}}{N_{s'k'r'}}, \quad (6)$$

where  $\beta$  is the per partnership transmission probability and  $c_r$  is the sexual partner change rate for individuals of sexual activity group  $r$ . The elements of the sexual mixing matrix

$$\begin{aligned} \rho_{ss'kk'rr'} &= \rho_{ss'kk'} \rho_{rr'} \\ &\left[ \epsilon_k \delta_{kk'} + (1 - \epsilon_k) \frac{\sum_v c_v N_{s'k'v}}{\sum_u \sum_v c_v N_{s'u v}} \right] \\ &\times \left[ \epsilon_r \delta_{rr'} + (1 - \epsilon_r) \frac{c_{r'}}{\sum_v c_v N_{s'k'v}} \right] \end{aligned} \quad (7)$$

describe the conditional probability of an individual of sex  $s$ , sub-population/canton  $k$  and sexual activity group  $r$  to have a sexual contact with an individual of the opposite sex  $s'$ , sub-population/canton  $k'$  and sexual activity group  $r'$ .  $\epsilon_k$  and  $\epsilon_r$  are the sexual mixing coefficients with respect to sub-population/canton and sexual activity group, respectively. Values of 1 represent fully assortative mixing where individuals only have sexual contacts with other individuals from the same sub-population/canton or sexual activity group. A value of 0 corresponds to proportional (random) mixing where sexual partners are chosen in proportion to the size of their sub-population/canton and their sexual activity group.  $\delta_{kk'}$  and  $\delta_{rr'}$  are the Kronecker deltas that are equal to 1 if  $k = k'$  or  $r = r'$  and to 0 otherwise. In the first scenario (assortative sexual mixing), we set  $\epsilon_k = 1$ . In the second scenario (proportional sexual mixing), we set  $\epsilon_k$  to 0.6 (model with two sub-populations) and 0.8 (cantonal model). Throughout all simulations, we set  $\epsilon_r = 0.5$ , which corresponds to partially assortative mixing with respect to sexual activity [19, 20].

**Table 1.** Summary of parameters for the HPV-16 transmission model.

| Parameter    | Description                                                                             | Value         | Unit     | Reference/Comment |
|--------------|-----------------------------------------------------------------------------------------|---------------|----------|-------------------|
| $N_{skr}$    | Number of 18–24 year olds of sex $s$ , sub-population/canton $k$ and activity group $r$ | See Table A.3 | –        | Swiss FSO         |
| $n_l$        | Proportion in the low sexual activity group                                             | 0.85          | –        | Estimated         |
| $n_h$        | Proportion in the high sexual activity group                                            | 0.15          | –        | Estimated         |
| $c_l$        | Heterosexual partner change rate in low activity group                                  | 0.17          | per year | Estimated         |
| $c_h$        | Heterosexual partner change rate in high activity group                                 | 2.41          | per year | Estimated         |
| $\mu$        | Rate at which individuals enter and leave the population                                | 0.14          | per year | 7-year age band   |
| $m$          | Rate at which individuals can change activity groups                                    | 1.0           | per year | [19, 20]          |
| $\epsilon_r$ | Assortativity index for sexual mixing between activity groups                           | 0.5           | –        | [19, 20]          |
| $\epsilon_k$ | Assortativity index for sexual mixing between sub-populations/cantons                   | 0.6, 0.8, 1.0 | –        | Assumption        |
| $s$          | Scaling factor for mobility-informed sexual mixing matrix $\sigma_{kk'}$                | 0.035         | –        | Calculated        |
| $\beta$      | Transmission probability per partnership                                                | 80%           | –        | [25]              |
| $\gamma$     | Rate at which infection is cleared spontaneously                                        | 0.55          | per year | [26]              |
| $\omega$     | Rate at which immunity is lost                                                          | 0.024         | per year | [26]              |
| $p_{sk}$     | Proportion of vaccinated individuals in canton $k$                                      | Fig. 1        | –        | Swiss FOPH        |

### 2.3.2. Mobility-informed sexual mixing

We used mobility data as a proxy for inter-cantonal sexual mixing by assuming that the heterosexual partner preference across cantons is proportional to the corresponding commuting patterns. The symmetrical matrix  $P_{\text{mob}}$  provides absolute numbers of commuters between cantons without specifying the commuters' canton of residence. We converted  $P_{\text{mob}}$  into an asymmetrical inter-cantonal mixing matrix  $\sigma_{kk'}$  that provides the conditional probabilities that a sexual contact from an individual from canton  $k$  occurs with someone from canton  $k'$ . To this end, we first rescaled  $P_{\text{mob}}$  by a scaling factor  $s$  and weighted all columns with the inverse of the cantonal population size:

$$\sigma_{kk'} = s \frac{P_{\text{mob}}}{N_k}. \quad (9)$$

We then replaced the diagonal entries of  $\sigma_{kk'}$  with the sum of all entries that are outside canton  $k$ :

$$\sigma_{kk} \mapsto 1 - \sum_{i \neq k} \sigma_{ki}. \quad (10)$$

The force of infection for the mobility-informed sexual mixing scenario is given by Eq. 6 with  $\rho_{ss'kk'rr'}$  being replaced by  $\sigma_{kk'} \rho_{ss'rr'}$ . We chose the scaling factor  $s$  such that the weighted proportion of intra-cantonal heterosexual contacts across all cantons is 80% (Fig. A.8), i.e., is the same as in the proportional sexual mixing scenario:

$$\sum_k \sigma_{kk} \frac{N_k}{\sum_k N_k} = 0.8. \quad (11)$$

### 2.4. Model simulations

We simulated the different model scenarios by numerically integrating the ODEs until the system approached the endemic pre-vaccination equilibrium ( $p_{sk} = 0$ ). We then initiated

the HPV vaccination program by setting  $p_{sk} > 0$ , and ran the model for a further number of years. The ODEs were solved in the R software environment for statistical computing [27] using the function *ode* from the package *deSolve*. We calculated the basic reproduction number ( $R_0$ ) using the next-generation matrix method as described by Diekmann et al. [28, 29] (Appendix A.1). This allowed us to compute the vaccination threshold  $V_C = 1 - 1/R_0$ . All code files can be downloaded from GitHub (<https://github.com/mauraner/HPV-regional-vaccine-heterogeneity-model>).

## 3. Results

### 3.1. HPV-16 dynamics

Using the parameters from Table 1, the transmission model provides a realistic description of the HPV-16 dynamics in Switzerland. The pre-vaccination prevalence of HPV-16 is 3.34% among 18–24 year olds. While this is somewhat lower than the expected and observed HPV-16 prevalence in Britain (Appendix A.2), it is in the range that is typically observed among women in other European countries [30]. The functional relationship between vaccination coverage and the reduction in HPV-16 prevalence 2 to 4 years post-vaccination is in good agreement with the findings of a systematic review (Appendix A.3) [1]. The basic reproduction number,  $R_0$ , of HPV-16 in our model is 1.29. This value corresponds to a vaccination threshold of 22% in the general population. If vaccination is targeting only one sex, the threshold increases to 39%.

### 3.2. Vaccination in two sub-populations

To better understand the effects of spatially heterogeneous vaccination uptake on infection transmission, we focused on a simplified model with just two sub-populations of the same size. We calculated the expected HPV-16 prevalence after 50





years of vaccinating the two sub-populations at different coverage rates (Fig. 3). In the first scenario, we assumed fully assortative sexual mixing between the two sub-populations, i.e., sexual contacts only occur between individuals from the same sub-population (Fig. 3a). The concave relation between vaccination coverage in the two sub-populations and the expected prevalence of HPV-16 overall indicates that homogeneous vaccination uptake always has the largest effect on reducing prevalence. For example, a vaccination coverage of 25% in both sub-populations results in a lower prevalence than vaccinating either of them at 50%. In the second scenario, we assumed a certain level of proportional mixing where 20% of sexual contacts are made with individuals from the other sub-population (Fig. 3b). Sexual mixing between the two sub-populations diminishes the negative effect of heterogeneous vaccination uptake, but homogeneous vaccination still results in the lowest prevalence of HPV-16. Fig. 3c shows the difference in the expected HPV-16 prevalence between the first (no sexual mixing between the sub-populations) and second (sexual mixing between the sub-populations) scenario. The higher the difference, the stronger the effect of sexual mixing is in reducing the negative consequences of heterogeneous vaccination uptake. This is particularly the case when vaccination is highly heterogeneous, i.e., when uptake is very high in one sub-population and very low in the other sub-population. In summary, these results illustrate that spatially heterogeneous vaccination uptake diminishes the effect of vaccination on reducing HPV-16 prevalence, but that sexual mixing between sub-populations can limit these undesired consequences by ‘homogenizing’ the overall population.

### 3.3. Transmission of HPV-16 within and between cantons

We extended our analysis of heterogeneous vaccination uptake by simulating the transmission of HPV-16 within and between the 26 cantons of Switzerland. The observed dynamics generalize some of the insights from the simplified model with two-subpopulations. After vaccination is introduced, HPV-16 prevalence begins to diverge across cantons (Fig. 4). After 15 years of vaccination, the range of expected HPV-16 prevalences depends on the assumed scenario for sexual mixing between cantons (see Methods). For fully assortative mixing, the highest and lowest prevalence are 2.40% (ZG, 17% vaccination coverage) and 0.12% (VS, 75% vaccination coverage), respectively (Fig. 4a). The range of cantonal HPV-16 prevalence narrows if sexual mixing between cantons is taken into account. The cantonal prevalence ranges from 1.28% to 0.23% for proportional mixing (Fig. 4b), and from 1.09% to 0.14% for mobility-informed mixing (Fig. 4c). Thus, sexual mixing between cantons again ‘homogenizes’ the infection dynamics and the effect of vaccination on reducing prevalence.

This effect is also reflected in the overall prevalence of HPV-16 in Switzerland. The national prevalence of HPV-16 is slightly higher under heterogeneous vaccination uptake compared with homogeneous uptake (Fig. 4a). This difference becomes smaller in the two scenarios that assume sexual mixing between the two cantons (Fig. 4b and 4c). In the most realistic scenario (mobility-informed mixing), the national prevalence

of HPV-16 is expected to drop to 0.55% after 15 years of heterogeneous vaccination uptake, while homogeneous vaccination uptake would drop the prevalence to 0.49%.

Inter-cantonal sexual mixing helps to reduce the prevalence of HPV-16 in cantons with low vaccination coverage at the expense of cantons with high vaccination coverage. At the national level, increasing sexual mixing between cantons always results in a lower HPV-16 prevalence (Fig. 5, dashed red lines), while the effect of sexual mixing at the cantonal level is more complex. The number of cantons that achieve a specific reduction in prevalence – expressed as relative risk (RR) reduction – can either decrease or increase with varying degrees of sexual mixing (Fig. 5). For example, high levels of sexual mixing between cantons (low  $\epsilon_k$ ) increase the number of cantons that achieve a 50% reduction in prevalence after 15 years of vaccination (Fig. 5a). In contrast, low levels of sexual mixing between cantons (high  $\epsilon_k$ ) are required to increase the number of cantons that achieve a RR reduction of 90%. On a timescale of 50 years, the number of cantons that reach a RR reduction of 99% is lowest for low, but realistic, levels of sexual mixing between cantons ( $\epsilon_k = 0.85 - 0.95$ ) (Fig. 5b). These levels of sexual mixing prevent the elimination of HPV-16 in high-coverage cantons, but they are too low for low-coverage cantons to sufficiently benefit from the herd immunity of high-coverage cantons.

## 4. Discussion

Uptake of HPV vaccination in 16 year old girls in Switzerland shows pronounced differences between different cantons ranging from 17 to 75%. We used a dynamic transmission model to study the expected consequences of this spatial heterogeneity in vaccination uptake on the transmission and prevalence of HPV-16 in Switzerland. Using a simple model with just two sub-populations, we found that heterogeneous vaccination uptake can diminish the effect of vaccination on reducing HPV-16 prevalence. This effect is particularly strong when vaccination is highly heterogeneous, i.e., when uptake is very high in one sub-population and very low in the other sub-population. These results were then corroborated with an extended model simulating the transmission of HPV-16 within and between the 26 cantons of Switzerland. Homogeneous vaccination uptake would generate a lower national HPV-16 prevalence compared to heterogeneous vaccination uptake, but the differences in prevalence are very small. We found that inter-cantonal sexual mixing homogenizes the infection dynamics, limits the undesired consequences of heterogeneous vaccination uptake, and reduces the inter-cantonal differences in HPV-16 prevalence.

This study describes the transmission of HPV-16 in Switzerland using a mathematical model to investigate how spatial heterogeneity in vaccination uptake affects prevalence. The example of Switzerland provides sufficient data for parameterizing a dynamic transmission model while exhibiting large variation in HPV-16 vaccine deployment. Using Swiss sexual behavior data, the model provided a realistic description of HPV-16 transmission in Switzerland, and allowed us to investigate the

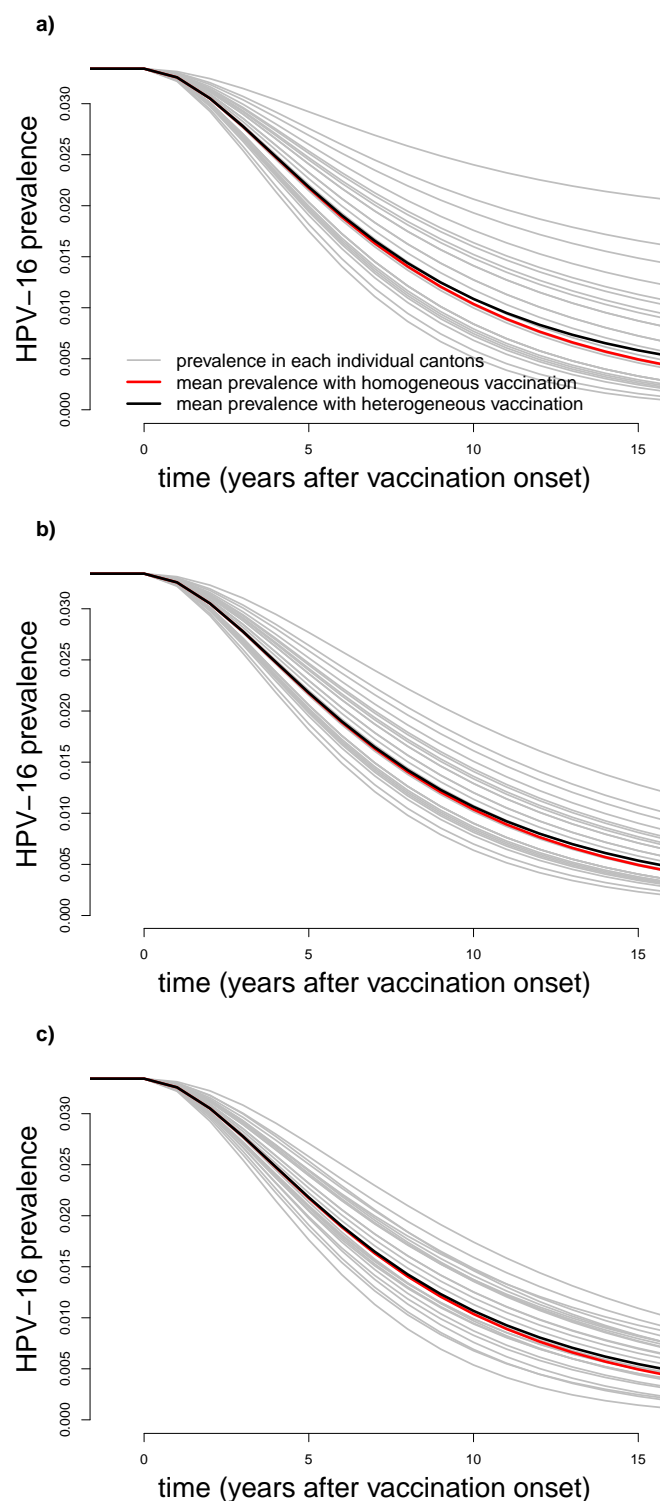

**Fig. 4.** Cantonal and national prevalence of HPV-16 after vaccine introduction. a) Fully assortative mixing (no sexual mixing between cantons). b) Proportional mixing (20% of sexual contacts are proportionally distributed over all of Switzerland). c) Mobility-informed mixing. Grey lines represent cantonal HPV-16 prevalence. The black and red lines correspond to the national prevalence for heterogeneous and homogeneous vaccination uptake, respectively.

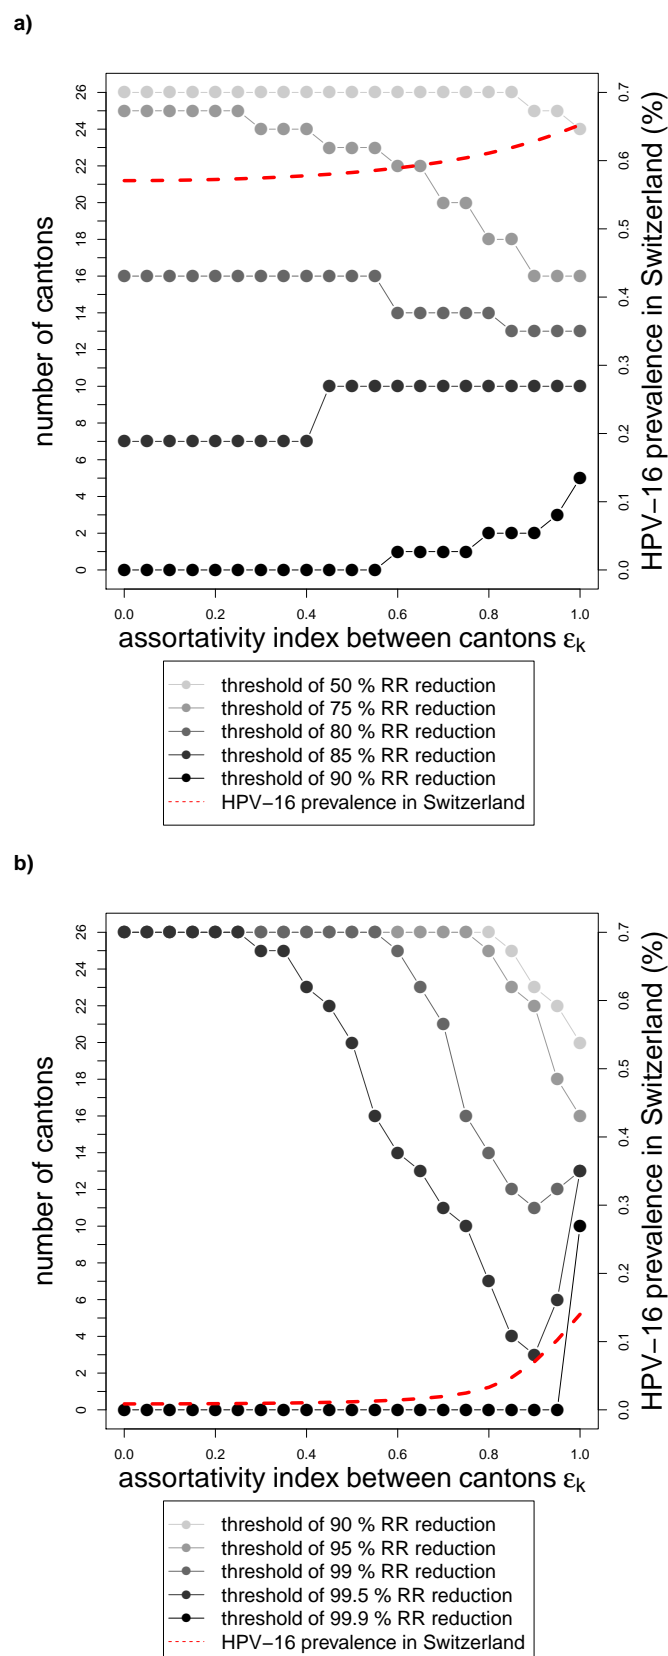

**Fig. 5.** Relationship between inter-cantonal sexual mixing and HPV-16 prevalence. The graphs show the number of cantons that achieve a specific relative risk (RR) reduction after 15 years (a) and 50 years (b) of vaccination. The dashed red lines correspond to the national prevalence which is lowest if sexual mixing is completely proportional ( $\epsilon_k = 0$ ). For all simulations, we used the proportional sexual mixing scenario.

expected effect of HPV vaccination. Our results do not change qualitatively when the number of cantons or parameter values are varied within reasonable ranges. In the absence of data describing inter-cantonal sexual mixing in Switzerland, we used commuting data and explored three different scenarios. The two scenarios that assumed partial sexual mixing between cantons – proportional sexual mixing and mobility-informed mixing – gave rise to a similar pattern, strengthening the validity of our findings.

Our study has a number of limitations that need be considered when interpreting the findings. First, we used a relatively simple model to describe the transmission of HPV-16, not taking into account potential sex-specific differences in sexual behavior and the infection life-history. Due to our focus on the transmission and prevalence of HPV-16, we did not include the progression of HPV infections to cervical intraepithelial neoplasia (CIN), as other modeling studies have done [7, 8, 25, 26]. Further, we did not consider different age classes and assumed that women can only become vaccinated before the age of 18. It is also important to note that our results depend on the assumption that the sexual behavior and the subsequent risk of HPV infection is the same across different cantons. Second, the comparison of the sexual behavior data (i.e., the estimated heterosexual partner change rates) between Swiss and British women needs to be treated with caution. Although the particular question about the number of new heterosexual partners was the same in both surveys, the methods for sampling and data collection differed considerably. While the SIR survey interviewed participants by phone, Natsal-3 relied on individuals filling in questionnaires at the participants' homes. This difference could have introduced a social desirability bias that could result in an underestimation of the heterosexual partner changes based on the SIR study. Given the sensitivity of our model with regard to per partnership transmission probabilities (Fig. A.6) and heterosexual partner change rates, our calculations of  $R_0$  and the vaccination threshold should be interpreted with caution. Third, in absence of data about the levels of sexual mixing between cantons, we assumed that inter-cantonal sexual mixing is proportional to the observed commuting patterns. Furthermore, we assumed that the national average of sexual contacts that are made with individuals from the same canton is 80% and that 20% are made with individuals from another canton. This assumption was informed by a Canadian study on couple composition regarding language membership (French, English or other) led in 1981 [31]. On average, 18.2% of couples in Quebec were exogamous, with some heterogeneity over different regions. Fourth, besides inter-cantonal variation in HPV vaccination uptake, there is also intra-cantonal variation. For example, vaccination uptake in Geneva, which has a school-based vaccination program, varies significantly among different nationalities and socio-economical status [32]. Investigating the causes and consequences of intra-cantonal variation in HPV vaccination uptake in Switzerland is part of ongoing work.

There are currently no population-based prevalence estimates of type-specific HPV in Switzerland. Our modeled pre-vaccination prevalence of HPV-16 is 3.34%, and is within a plausible range for women in European countries. A meta-

analysis of more than 1 million women estimated HPV-16 prevalence at 4.8% and 3.2% in Europe and globally, respectively [30]. Only a few studies provide estimates for the basic reproduction number,  $R_0$ , or equivalently, the vaccination threshold of HPV-16 or other HPV types. Ribassin-Majed et al. [33] estimated  $R_0 = 1.73$  for HPV-16/18 in France, corresponding to a vaccination threshold of 67% for one sex. These values are higher than what we calculated for Switzerland, but in a similar range to what would be expected in Britain (Table A.2). The lower values that we calculated for Switzerland underline the possibility of underreporting in the Swiss sexual behavior survey.

Our results need to be interpreted in the context of the current HPV literature considering heterogeneity in vaccination. The finding that decreasing heterogeneity in vaccination uptake increases impact helps interpreting the result by Durham et al. [15] who showed that vaccination efforts should be targeted towards low-vaccination states in the USA. Increasing vaccination uptake in populations with low-vaccination uptake has the strongest effect for reducing vaccination heterogeneity overall. The study by Shafer et al. [16] on unequal HPV vaccination uptake among different ethnic groups in Canada, suggests that heterogeneous vaccination can lead to spillover effects across groups. Our study illustrates that the effect of heterogeneous vaccination uptake between different populations will largely depend on the amount of sexual mixing between them.

Our findings could have implications for the future planning of HPV vaccination programs at the cantonal and national level in Switzerland. From the point of view of a particular canton, the achieved reduction in HPV-16 prevalence will not only depend on the cantonal vaccination program, but also on the indirect effects of vaccination efforts in other (particularly neighboring) cantons and how these effects are dissipated via intra-cantonal sexual mixing. For the most plausible scenario for inter-cantonal mixing (mobility-informed sexual mixing), we found that cantons with high vaccination coverage experience a less effective reduction in HPV-16 prevalence to what would be expected if they were isolated (assortative sexual mixing). Conversely, this effect benefits those cantons with a low vaccination uptake that achieve a higher reduction in prevalence to what would be expected in absence of intra-cantonal sexual mixing. The intensity of cantonal dissipation of vaccination efforts is again mediated by intra-cantonal sexual mixing. The number of cantons that surpass a pre-defined RR reduction is highly sensitive to the level of assortative mixing between cantons (Fig. 5). The results of this study suggest that a harmonization of programs between cantons, and a reduction in vaccination heterogeneity, would result in a stronger effect of vaccination on reducing HPV-16 prevalence in Switzerland. The generality of our results on the effects of spatial heterogeneity in vaccination uptake are also of interest in the context of other infectious diseases.

In summary, we found that spatial heterogeneity in HPV vaccination uptake is expected to diminish the effect of vaccination on HPV-16 prevalence, but the overall effect is small. In the context of Switzerland, this means that cantonal efforts towards a reduction of HPV-prevalence are impaired by cantons with



low vaccination uptake. Harmonisation of cantonal vaccination programmes would reduce inter-cantonal differences in prevalence.

### Acknowledgment

We would like to thank the Swiss Federal Office of Public Health (FOPH), the Swiss Federal Office for Spatial Development (ARE), and the investigators of the British National Survey of Sexual Attitudes and Lifestyles (Natsal) for providing access to the data used in this study.

**Funding:** This study was supported by the Swiss Cancer League and the Swiss Cancer Research foundation (# 3049-08-2012).

## Appendix A. Supplementary material

### Appendix A.1. Basic reproduction number

The basic reproduction number,  $R_0$ , can be calculated using the next-generation matrix method as described by Diekmann et al. [28, 29]. As we did not consider sex-specific differences in sexual behavior or the natural history of HPV-16, and assumed that the sexual behavior of individuals is the same across all cantons, we can simplify the model into a single population with two different sexual activity groups. The transmission matrix  $F$  can then be given by

$$F = \begin{bmatrix} \beta c_l \rho_{ll} n_l / n_l & \beta c_l \rho_{lh} n_l / n_h \\ \beta c_h \rho_{hl} n_h / n_l & \beta c_h \rho_{hh} n_h / n_h \end{bmatrix}, \quad (\text{A.1})$$

whereas the transition matrix  $V$  is given by

$$V = \begin{bmatrix} \gamma + \mu + mn_h & -mn_l \\ -mn_l & \gamma + \mu + mn_l \end{bmatrix}. \quad (\text{A.2})$$

$R_0$  is defined as the dominant eigenvalue of the next-generation matrix  $G = FV^{-1}$ .

### Appendix A.2. HPV-16 dynamics: Comparison to Britain

In order to compare the modeled prevalence of HPV-16 in Switzerland and Britain, we parameterized the transmission model with data from the third British National Survey of Sexual Attitudes and Lifestyles 3 (Natsal-3) [22]. To this end, we estimated the sexual partner change rates for the same two sexual activity groups (Table A.2). For better comparison between Switzerland and Britain, we forced the size of the sexual activity groups to be the same between the two countries (see Table 1). The estimated heterosexual partner change rates for both sexual activity groups in Britain are higher than in Switzerland. Hence, the modeled pre-vaccination prevalence of HPV-16 for a given per partnership transmission probability is higher for the British model than the Swiss model (Fig. A.6). The per partnership transmission probability is a highly model-specific parameter with considerable uncertainty. Two different modeling studies estimated the transmission probability at 0.72 (95% posterior interval: [0.29 - 1.00]) [26] and 0.80 (95% posterior interval: [0.60, 0.99]) [25]. For our subsequent analyses, we chose a transmission probability of 0.80, as estimated by Boggaards et al. [25], because it results in realistic HPV-16 prevalences for Britain and Switzerland.

**Table A.2.** Comparison of model parameters and outputs between Switzerland (SIR survey) and Britain (Natsal-3). The model outputs are based on a per partnership transmission probability of 80% [25].

| Parameter/Output                               | SIR   | Natsal-3 |
|------------------------------------------------|-------|----------|
| Partner change rate low activity ( $y^{-1}$ )  | 0.17  | 0.37     |
| Partner change rate high activity ( $y^{-1}$ ) | 2.41  | 3.60     |
| Pre-vaccination prevalence of HPV-16           | 3.34% | 7.72%    |
| Basic reproduction number, $R_0$               | 1.29  | 1.90     |
| Vaccination threshold for one sex              | 39.6% | 72.3%    |

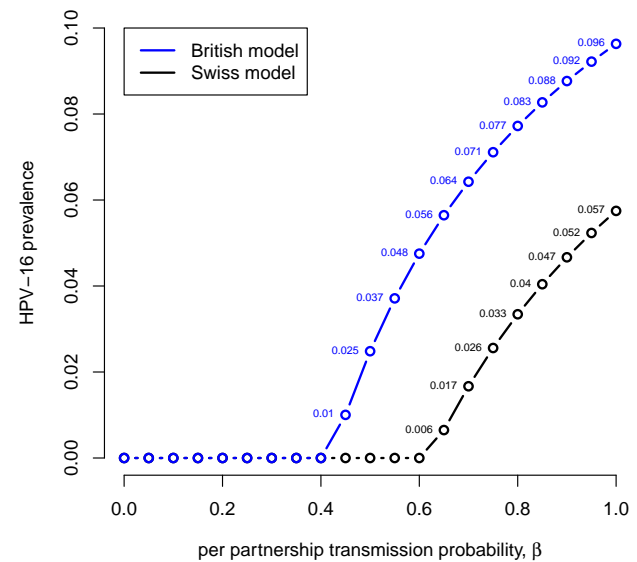

**Fig. A.6.** Prevalence of HPV-16 as a function of the per partnership transmission probability. The modeled pre-vaccination prevalences are based on Swiss (black) and British (blue) data (SIR and Natsal-3 survey, respectively).

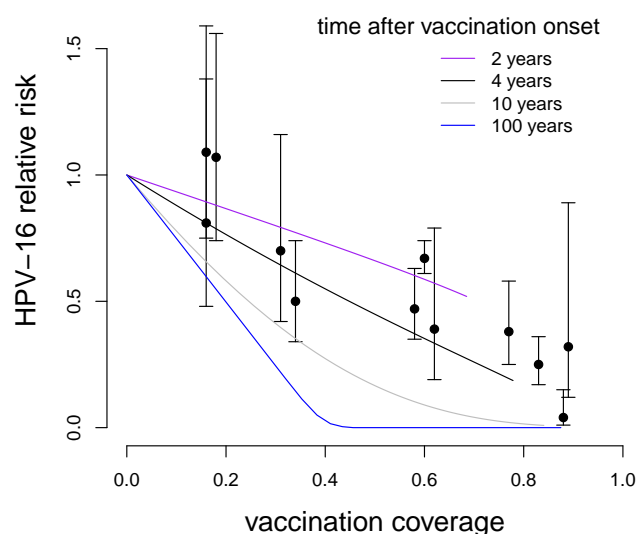

**Fig. A.7.** Reduction in HPV-16 prevalence as a function of vaccination coverage. The solid lines represent the modeled HPV-16 prevalence, normalized and expressed as a relative risk (RR), after 2, 4, 10 and 100 years of vaccination. The data represent the change in HPV-16/18 prevalence between the pre- and post-vaccination periods from several countries as reported in the systematic review by Drolet et al. [1]. Individual points represent data with different vaccination coverage from either 13–19 or 20–24 year old girls in the US, United Kingdom or Australia. The difference between the pre-vaccination and post-vaccination periods ranged between 1–4 years.

**Table A.3.** Cantonal population sizes of 18–24 year old women and men in Switzerland. For the transmission model, we assumed a 1:1 sex ratio. Data are from the Swiss Federal Statistical Office (FSO).

| Canton                 | Acronym | Population size |
|------------------------|---------|-----------------|
| Zürich                 | ZH      | 105,586         |
| Bern                   | BE      | 80,549          |
| Luzern                 | LU      | 35,656          |
| Uri                    | UR      | 3269            |
| Schwyz                 | SZ      | 12,641          |
| Obwalden               | OW      | 3269            |
| Nidwalden              | NW      | 3513            |
| Glarus                 | GL      | 3477            |
| Zug                    | ZG      | 8838            |
| Fribourg               | FR      | 27,666          |
| Solothurn              | SO      | 22,161          |
| Basel-Stadt            | BS      | 13,441          |
| Basel-Landschaft       | BL      | 21,313          |
| Schaffhouse            | SH      | 6587            |
| Appenzell Ausserrhoden | AR      | 4847            |
| Appenzell Innerrhoden  | AI      | 1595            |
| St.Gallen              | SG      | 46,129          |
| Graubünden             | GR      | 16,474          |
| Aargau                 | AG      | 52,832          |
| Thurgau                | TG      | 23,722          |
| Ticino                 | TI      | 25,780          |
| Vaud                   | VD      | 69,060          |
| Valais                 | VS      | 29,800          |
| Neuchâtel              | NE      | 15,849          |
| Genève                 | GE      | 40,033          |
| Jura                   | JU      | 6418            |

### Appendix A.3. HPV-16 dynamics: Vaccination coverage and prevalence

We compared the functional relationship between the vaccination coverage and the expected reduction in HPV-16 prevalence from our model with data from a systematic review [1]. In the model described in the main text, we assumed that women can only become vaccinated before they enter the population of 18–24 year olds. For a given proportion of women that become vaccinated  $p$ , it typically takes a number of years until the proportion of vaccinated women across the 18–24 year age band approaches the same value. In order to compare our model results with the data, we did a modification in how vaccination is modeled and assumed that all 18–24 year old susceptible women can become vaccinated at rate  $p$  per year. And when we look at the vaccination coverage we consider the proportion of the population which is effectively vaccinated at a given time point. The modeled reduction in HPV-16 prevalence 2–4 years after onset of vaccination is in good agreement with the reported data from several studies that covered a time span of 1–4 years (Fig. A.7).

## References

- [1] M. Drolet, E. Benard, M.-C. Boily, H. Ali, L. Baandrup, H. Bauer, S. Beddows, J. Brisson, J. M. L. Brotherton, T. Cummings, B. Donovan, C. K. Fairley, E. W. Flagg, A. M. Johnson, J. A. Kahn, K. Kavanagh, S. K.

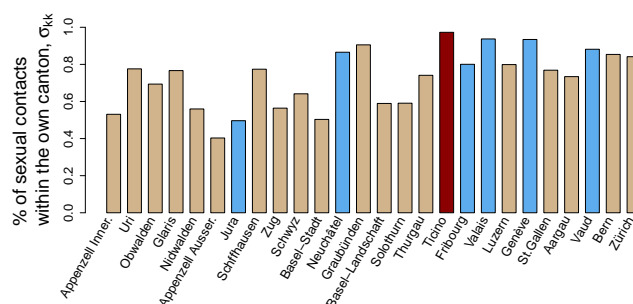

**Fig. A.8.** Proportion of intra-cantonal contacts ( $\sigma_{kk}$ ) for the mobility-informed sexual mixing scenario. The weighted average across all cantons was set to 0.8. Cantons with a French-, German- or Italian-speaking majority are indicated in blue, beige and red, respectively. Cantons are ranked by increasing population size.

**Table A.4.** HPV vaccination uptake in 16 year old girls in Switzerland. Data from the last completed survey period (2011-2013) if the Swiss National Vaccination Coverage Survey (SNVCS). Data from Geneva and Appenzell Innerr. are from 2010 and 2014, respectively.

| Canton                 | Acronym | % three dose | % two dose | % one dose |
|------------------------|---------|--------------|------------|------------|
| Zürich                 | ZH      | 44           | 3          | 2          |
| Bern                   | BE      | 37           | 5          | 2          |
| Luzern                 | LU      | 50           | 4          | 2          |
| Uri                    | UR      | 40           | 5          | 1          |
| Schwyz                 | SZ      | 27           | 3          | 1          |
| Obwalden               | OW      | 31           | 2          | 1          |
| Nidwalden              | NW      | 61           | 0          | 0          |
| Glarus                 | GL      | 47           | 7          | 2          |
| Zug                    | ZG      | 17           | 3          | 4          |
| Fribourg               | FR      | 71           | 1          | 1          |
| Solothurn              | SO      | 53           | 3          | 2          |
| Basel-Stadt            | BS      | 52           | 4          | 0          |
| Basel-Landschaft       | BL      | 64           | 1          | 1          |
| Schaffhouse            | SH      | 40           | 4          | 3          |
| Appenzell Ausserrhoden | AR      | 24           | 3          | 2          |
| Appenzell Innerrhoden  | AI      | 34           | 3          | 3          |
| St.Gallen              | SG      | 59           | 5          | 0          |
| Graubünden             | GR      | 44           | 6          | 2          |
| Aargau                 | AG      | 59           | 3          | 0          |
| Thurgau                | TG      | 35           | 6          | 2          |
| Ticino                 | TI      | 38           | 7          | 0          |
| Vaud                   | VD      | 66           | 1          | 2          |
| Valais                 | VS      | 75           | 3          | 1          |
| Neuchâtel              | NE      | 59           | 3          | 3          |
| Genève                 | GE      | 62           | 5          | 0          |
| Jura                   | JU      | 63           | 0          | 1          |

- Kjaer, E. V. Kliwer, P. Lemieux-Mellouki, L. Markowitz, A. Mboup, D. Mesher, L. Niccolai, J. Oliphant, K. G. Pollock, K. Soldan, P. Sonnenberg, S. N. Tabrizi, C. Tanton, M. Brisson, Population-level impact and herd effects following human papillomavirus vaccination programmes: systematic review and meta-analysis, *Lancet Infectious Diseases* 15 (5) (2015) 565–580. doi:10.1016/S1473-3099(14)71073-4.
- [2] C. Giambi, S. Donati, S. Declich, S. Salmaso, M. L. C. degli Atti, M. P. Alibrandi, S. Brezzi, F. Carozzi, N. Collina, D. Franchi, A. Lattanzi, M. Meda, M. C. Minna, R. Nannini, I. Scherillo, A. Bella, Estimated acceptance of HPV vaccination among Italian women aged 18–26 years, *Vaccine* 29 (46) (2011) 8373–8380. doi:10.1016/j.vaccine.2011.08.079.
- [3] M. Rahman, T. H. Laz, A. B. Berenson, Geographic variation in human papillomavirus vaccination uptake among young adult women in the united states during 2008–2010, *Vaccine* 31 (47) (2013) 5495–9. doi:10.1016/j.vaccine.2013.09.022.
- [4] Bundesamt für Gesundheit, Abteilung übertragbare Krankheiten, Die HPV-Impfung in der Schweiz: Resultate einer nationalen Befragung im Jahr 2014, *Bulletin* 23/15 (2015) 445–452.
- [5] EBPI- Universität Zürich und Bundesamt für Gesundheit, Durchimpfung von 2-, 8- und 16- Jährigen Kindern in der Schweiz, 1999–2014, <http://www.bag.admin.ch/themen/medizin/00682/00685/02133/index.html?lang=de> (2011–2013 (accessed October 10, 2016)).
- [6] R. V. Barnabas, P. Laukkanen, P. Koskela, O. Kontula, M. Lehtinen, G. P. Garnett, Epidemiology of HPV 16 and Cervical Cancer in Finland and the Potential Impact of Vaccination: Mathematical Modelling Analyses, *PLoS Med* 3 (5) (2006) e138. doi:10.1371/journal.pmed.0030138.
- [7] Y. H. Choi, M. Jit, N. Gay, A. Cox, G. P. Garnett, W. J. Edmunds, "transmission dynamic modelling of the impact of human papillomavirus vaccination in the united kingdom", *Vaccine* 28 (24) (2010) 4091–102. doi:10.1016/j.vaccine.2009.09.125.
- [8] J. A. Bogaards, V. M. H. Coupé, M. Xiridou, C. J. L. M. Meijer, J. Wallinga, J. Berkhof, Long-term impact of human papillomavirus vaccination on infection rates, cervical abnormalities, and cancer incidence, *Epidemiology (Cambridge, Mass.)* 22 (4) (2011) 505–515. doi:10.1097/EDE.0b013e31821d107b.
- [9] A. Scherer, A. McLean, Mathematical models of vaccination, *Br Med Bull* 62 (2002) 187–99.
- [10] K. Glass, K. Kappey, B. T. Grenfell, The effect of heterogeneity in measles vaccination on population immunity, *Epidemiology and Infection* 132 (4) (2004) 675–683.
- [11] E. T. Alexander, S. D. McMahon, N. Roberts, E. Sutti, D. Burckow, M. Manning, K. E. Yong, S. Suslov, The Effects of Regional Vaccination Heterogeneity on Measles Outbreaks with France as a Case Study, *arXiv:1408.0695 [q-bio]* ArXiv: 1408.0695.
- [12] E. A. Ferguson, K. Hampson, S. Cleaveland, R. Conunji, R. Deray, J. Friar, D. T. Haydon, J. Jimenez, M. Pancipane, S. E. Townsend, Heterogeneity in the spread and control of infectious disease: consequences for the elimination of canine rabies, *Scientific Reports* 5 (2015) 18232. doi:10.1038/srep18232.
- [13] J. A. Bogaards, M. Kretzschmar, M. Xiridou, C. J. L. M. Meijer, J. Berkhof, J. Wallinga, Sex-Specific Immunization for Sexually Transmitted Infections Such as Human Papillomavirus: Insights from Mathematical Models, *Plos Medicine* 8 (12) (2011) e1001147. doi:10.1371/journal.pmed.1001147.
- [14] J. A. Bogaards, J. Wallinga, R. H. Brakenhoff, C. J. L. M. Meijer, J. Berkhof, Direct benefit of vaccinating boys along with girls against oncogenic human papillomavirus: bayesian evidence synthesis, *Bmj* 350 (2015) h2016. doi:10.1136/bmj.h2016.
- [15] D. P. Durham, M. L. Ndeffo-Mbah, L. A. Skrip, F. K. Jones, C. T. Bauch, A. P. Galvani, National- and state-level impact and cost-effectiveness of nonavalent HPV vaccination in the United States, *Proceedings of the National Academy of Sciences* 113 (18) (2016) 5107–5112. doi:10.1073/pnas.1515528113.
- [16] L. A. Shafer, I. Jeffrey, B. Elias, B. Shearer, K. Canfell, E. Kliwer, Quantifying the impact of dissimilar HPV vaccination uptake among Manitoban school girls by ethnicity using a transmission dynamic model, *Vaccine* 31 (42) (2013) 4848–4855. doi:10.1016/j.vaccine.2013.07.073.
- [17] R. M. Anderson, R. M. May, *Infectious Diseases of Humans: Dynamics and Control*, Oxford University Press, Oxford, 1991.
- [18] Dynamics of infectious diseases, *Reports on Progress in Physics* 77 (2) (2014) 026602. doi:10.1088/0034-4885/77/2/026602. URL <http://stacks.iop.org/0034-4885/77/i=2/a=026602>
- [19] S. M. Fingerhuth, S. Bonhoeffer, N. Low, C. L. Althaus, Antibiotic-Resistant Neisseria gonorrhoeae Spread Faster with More Treatment, Not More Sexual Partners, *PLoS Pathog* 12 (5) (2016) e1005611. doi:10.1371/journal.ppat.1005611.
- [20] C. L. Althaus, M. Choisy, S. a. Alizon, Number of sex acts matters for heterosexual transmission and control of *Chlamydia trachomatis*, *PeerJ PrePrints* 3 (2015) e1164. doi:10.7287/peerj.preprints.940v1.
- [21] C. L. Althaus, J. C. Heijne, S. A. Herzog, A. Roellin, N. Low, Individual and population level effects of partner notification for Chlamydia trachomatis, *PLoS One* 7 (12) (2012) e51438.
- [22] C. H. Mercer, C. Tanton, P. Prah, B. Erens, P. Sonnenberg, S. Clifton, W. Macdowall, R. Lewis, N. Field, J. Datta, A. J. Copas, A. Phelps, K. Wellings, A. M. Johnson, Changes in sexual attitudes and lifestyles in Britain through the life course and over time: findings from the National Surveys of Sexual Attitudes and Lifestyles (Natsal), *Lancet* 382 (9907) (2013) 1781–94. doi:10.1016/S0140-6736(13)62035-8.
- [23] Federal Office for Spatial Development, Travel behaviour - Mobility and Transport Microcensus (MTMC), <https://www.are.admin.ch/are/en/home/transport-and-infrastructure/data/travel-behaviour.html> (2010).
- [24] Federal Statistical Office (OFS, BAS, UST), Population size and population composition - Permanent population in year 2013 per canton, male and female between 18–24 years, [https://www.pxweb.bfs.admin.ch/default.aspx?px\\_language=fr](https://www.pxweb.bfs.admin.ch/default.aspx?px_language=fr) (2013 (accessed October 10, 2016)).
- [25] J. A. Bogaards, M. Xiridou, V. M. H. Coupé, C. J. L. M. Meijer, J. Wallinga, J. Berkhof, Model-based estimation of viral transmissibility and infection-induced resistance from the age-dependent prevalence of infection for 14 high-risk types of human papillomavirus, *American Journal of Epidemiology* 171 (7) (2010) 817–825. doi:10.1093/aje/kwp466.
- [26] H. C. Johnson, K. M. Elfström, W. J. Edmunds, Inference of Type-Specific HPV Transmissibility, Progression and Clearance Rates: A Mathematical Modelling Approach, *PLoS ONE* 7 (11) (2012) e49614. doi:10.1371/journal.pone.0049614.
- [27] R Core Team, R: A Language and Environment for Statistical Computing, R Foundation for Statistical Computing, Vienna, Austria (2016).
- [28] O. Diekmann, J. a. P. Heesterbeek, J. a. J. Metz, On the definition and the computation of the basic reproduction ratio  $R_0$  in models for infectious diseases in heterogeneous populations, *Journal of Mathematical Biology* 28 (4) (1990) 365–382. doi:10.1007/BF00178324.
- [29] O. Diekmann, J. A. P. Heesterbeek, M. G. Roberts, The construction of next-generation matrices for compartmental epidemic models, *Journal of the Royal Society Interface* 7 (47) (2010) 873–885. doi:10.1098/rsif.2009.0386.
- [30] L. Bruni, M. Diaz, M. Castellsagué, E. Ferrer, F. X. Bosch, S. d. Sanjosé, Cervical Human Papillomavirus Prevalence in 5 Continents: Meta-Analysis of 1 Million Women with Normal Cytological Findings, *Journal of Infectious Diseases* 202 (12) (2010) 1789–1799. doi:10.1086/657321.
- [31] M. Termote, D. Gouveau, La situation démolinguistique du Québec, [http://www.cslf.gouv.qc.ca/bibliotheque-virtuelle/publication-html/?tx\\_igccplus\\_pi4%5bfile%5d=publications-pubb128/b128ch1.html#02](http://www.cslf.gouv.qc.ca/bibliotheque-virtuelle/publication-html/?tx_igccplus_pi4%5bfile%5d=publications-pubb128/b128ch1.html#02) (1986, (accessed October 11, 2016)).
- [32] E. Jeannot, C.-A. Wyler, A. Meynard, B. Kaiser, P. Sudre, J. Alvarin, P. Chastonay, Factors associated with HPV immunization for 13–14-year-old girls in the Geneva district, Switzerland, *Revue D Epidemiologie Et De Sante Publique* 61 (6) (2013) 513–518. doi:10.1016/j.respe.2013.07.683.
- [33] L. Ribassin-Majed, R. Lounès, S. Cléménçon, Modeling Human Papillomavirus transmission. Impact of a quadrivalent vaccine., 17 pages (Nov. 2010).
